# Supplementary material
Source: PubMed Central journal article supplement (PMC3351348)
Supplement: supp_M112.347138_jbc.M112.347138-1.pdf [file supp_M112.347138_jbc.M112.347138-1.pdf]

## SUPPLEMENT INFORMATION

**Fig S1:** Pathways for synthesis of three major phospholipids in human, *Plasmodium* and *Toxoplasma*. The *H. sapiens* and *P. falciparum* pathways are adapted from literature, and of *T. gondii* are constructed based on the reported enzyme activities and annotations in the parasite database ([www.ToxoDB.org](http://www.ToxoDB.org)). The pathways, common to all organisms, are shown in black; and those specific to human, are depicted in green. The SDPM-pathway, shown in purple, denotes a plant-type route for PtdEtn and PtdCho synthesis, and is exclusive to *P. falciparum*. Initial precursors are shown in blue; the intermediates of lipid synthesis are in black; phospholipids are in red, and the enzymes are depicted in brown color. DME is metabolized via the CDP-choline route and produces PtdDME, which is not methylated to PtdCho in *T. gondii* causing disruption of membrane biogenesis. The treatment of parasite cultures with DME leads to a reduction in PtdCho and an accumulation of PtdDME. CK, choline kinase; PCT, phosphocholine cytidyltransferase; CPT, CDP-choline phosphotransferase; EK, ethanolamine kinase; PET, phosphoethanolamine cytidyltransferase; EPT, CDP-ethanolamine phosphotransferase; PEMT, phosphatidylethanolamine methyltransferase; PMT, phosphoethanolamine methyltransferase; SD, serine decarboxylase; PSS, phosphatidylserine synthase; PSD, phosphatidylserine decarboxylase; DME, dimethylethanolamine.

**Fig S2:** The *TgCK* cDNA encodes a choline kinase with 630 residues, which shows 19%, 16% and 10% identity with *HsCK $\alpha$* , *PfCK* and *ScCK1*, respectively. Sequence alignment (A) and percentage identity (B) of *TgCK* cDNA. The best homologies are found in the Brenner's (red box) and choline kinase (blue box) motives. *TgCK* also harbors an N-terminal hydrophobic peptide (first 20 amino acids; magenta box) with no homology to a known protein in the NCBI database. The NCBI accession: *HsCK $\alpha$* , NP\_001268.2; *PfCK*, PF14\_0020; *ScCK1*, YLR133W.

**Fig S3:** The *TgEK* cDNA encodes for an ethanolamine kinase with 547 residues, which shows 21%, 20% and 14% identity with *HsEK1 $\alpha$* , *PfEK* and *ScEK1*. . Sequence alignment (A) and percentage identity (B) of *TgEK* cDNA. The NCBI accession: *HsEK1 $\alpha$* , NP\_061108.2; *PfEK*, PF11\_0257; *ScEK1*, YDR147W.

**Fig S4:** *TgCK* shows a punctate intracellular distribution in *T. gondii*. (A) Indirect Immuno-fluorescence assay performed with tachyzoite-infected human foreskin fibroblasts or axenic parasites using the mouse anti-*TgCK* sera and the Alexa488 antibodies. (B) *TgCK* expression in COS-7 cells. The *TgCK* with a C-terminal V5-tag (*TgCK*-V5) was over-expressed under the control of the *pCMV* promoter and localized using anti-V5 antibody (green). Cells were co-stained with phalloidin to visualize the cytosolic actin (red).

**Fig S5:** The *Δtgck<sub>i</sub>* mutant is not impaired in its *in vitro* growth, which can, however, be inhibited by a choline analog, dimethylethanolamine (DME). (A) Quantification of plaques formed by the *Δtgck<sub>i</sub>* mutant and the parental strain. In total, 100 plaques from three independent assays were scored for their sizes. (B) Parasites in their vacuoles were counted in the parasitized HFF (29 hrs post-infection) following anti-*TgGap45* staining. Values are means  $\pm$ S.E. for 3 independent experiments, each with 50 parasitophorous vacuoles. (C) Identification of 53-kDa and 44-kDa protein isoforms using anti-*TgCK* sera. Immuno-blot of cell-free extract (CFE) prepared from *T. gondii* tachyzoites and uninfected HFF (negative control) using anti-*TgCK* (1:200) and anti-*TgActin* (control for parasite proteins; 1:1000) antibodies.
