# Supplementary material
Source: PubMed Central journal article supplement (PMC3351348)
Supplement: supp_M112.347138_jbc.M112.347138-3.pdf [file supp_M112.347138_jbc.M112.347138-3.pdf]

**Table S1: Cloning primers used in this study**

| <b>Primer Name<br/>(restriction site)</b>                                        | <b>Primer Sequence<br/>(restriction site underlined)</b>                                                     | <b>Cloning Vector<br/>(research objective)</b>                                  |
|----------------------------------------------------------------------------------|--------------------------------------------------------------------------------------------------------------|---------------------------------------------------------------------------------|
| <b>Functional Expression of TgCK and TgEK in <i>E. coli</i></b>                  |                                                                                                              |                                                                                 |
| TgCK-F ( <i>NdeI</i> )<br>TgCK-R ( <i>HindIII</i> )                              | CTC <u>CATATGCAGG</u> TA <u>CTCGCGTGTGT</u><br>CTC <u>AAGCTTCTTTCGAGCCGGGAAGAGT</u>                          | <i>pET22b<sup>+</sup></i> (TgCK-6xHis in Rosetta strain)                        |
| TgCK-wo-HP-F ( <i>NdeI</i> )<br>TgCK-R ( <i>BglII</i> )                          | CTCATCC <u>CATATG</u> TCCCTTCAGGCGCTGGCT<br>CTC <u>AGATCTTCACTTTCGAGCCGGGAAGAGTCC</u>                        | <i>pET28b<sup>+</sup></i> (6xHis-TgCK <sub>s</sub> in Rosetta strain)           |
| TgEK-F ( <i>NcoI</i> )<br>TgEK-R ( <i>HindIII</i> )                              | CTCC <u>ATGGCCAGCAAGGCAGAGAGAAC</u><br>CTC <u>AAGCTTGAACGACAAATGCGGGACT</u>                                  | <i>pET28b<sup>+</sup></i> (TgEK-6xHis in Rosetta strain)                        |
| <b>Functional Expression of ScCK1 and ScEK1 in <i>S. cerevisiae</i></b>          |                                                                                                              |                                                                                 |
| ScCK1-F ( <i>NotI</i> )<br>ScCK1-R ( <i>NotI</i> )                               | CTC <u>GCGGCCGCATGGTACAAGAATCACGTCCA</u><br>CTC <u>GCGGCCGCTTACAAATAACTAGTATCGAGGAACCTT</u>                  | <i>pESC-Ura</i> (ScCK1 in KS106 strain)                                         |
| ScEK1-F ( <i>SpeI</i> )<br>ScEK1-R ( <i>BglII</i> )                              | CTC <u>ACTAGTATGTACACCAATTATCACTTAC</u><br>CTC <u>AGATCTTTAAAAATAAGTTTAGTGTCTAAG</u>                         | <i>pESC-Ura</i> (ScEK1 in KS106 strain)                                         |
| <b>Subcellular Localization of TgCK and TgEK in <i>T. gondii</i></b>             |                                                                                                              |                                                                                 |
| TgCK-Term-F ( <i>HindIII</i> )<br>TgCK-Term-R ( <i>NheI</i> )                    | CTC <u>AAGCTTCTGGAATTTGGAGTCAACGC</u><br>CTCGCTAGCCAAGCAGAAGTCGGATATTAGCG                                    | Step # 1 for expressing TgCK-HA under the <i>pTgCK</i> promoter in tachyzoites  |
| TgCK-Prom-F ( <i>ApaI</i> )<br>TgCK-Prom-R ( <i>HindIII</i> )                    | CTC <u>GGGCCCGGCAGGTGGTTTTGCTTC</u><br>CTACTG <u>AAGCTTGAATACTCTCGAAC</u>                                    | Step # 2 for expressing TgCK-HA under the <i>pTgCK</i> promoter in tachyzoites  |
| TgCK-ORF-F ( <i>HindIII</i> )<br>TgCK-ORF-HA-R ( <i>HindIII</i> )                | GTATTC <u>AAGCTT</u> CAGTAGCACCAAC<br>CTC <u>AAGCTTTC</u> AAGCGTAATCTGGAACATCGTATGGGTA<br>CTTTCGAGCCGGGAAGAG | Step # 3 for expressing TgCK-HA under the <i>pTgCK</i> promoter in tachyzoites  |
| TgCK-Prom-HP-Ty1-F ( <i>NheI</i> )<br>TgCK-Prom-HP-Ty1-R ( <i>ApaI</i> )         | CTCTCTGCTAGCCTGGATAAATACCCGATGCTACAAATC<br>CTCTCTGGGCCCATCGAGCGGGTCTGGTTCGTGTGGAC<br>CTCAGCGCCTGAAGGGGACGC   | Step # 1 for expressing TgCK-Ty1 under the <i>pTgCK</i> promoter in tachyzoites |
| TgCK-ORF-Term-F ( <i>ApaI</i> )<br>TgCK-ORF-Term-R ( <i>ApaI</i> )               | CTCTCTGGGCCCGGCTCTTTGTTTCTGGTGGC<br>CTCTCTGGGCCCAAGCAGAAGTCGGATATTAGCG                                       | Step # 2 for expressing TgCK-Ty1 under the <i>pTgCK</i> promoter in tachyzoites |
| TgCK <sub>s</sub> -F ( <i>SbfI</i> )<br>TgCK <sub>s</sub> -myc-R ( <i>PacI</i> ) | CTCATCCCTGCAGGCCCTTCAGGCGCTGGCT<br>CTCATCTTAAATTAAGTAGAGGTCTTCTCGGAAATCAAC<br>TTCTGTTCCTTTCGAGCCGGGAAGAGTCCA | <i>pTKO</i> (For expressing TgCK <sub>s</sub> -myc in tachyzoites)              |
| TgEK-F ( <i>NcoI</i> )<br>TgEK-HA-R ( <i>PacI</i> )                              | CTCC <u>ATGGCCAGCAAGGCAGAGAGAAC</u><br>CTCTTAAATTAATCAAGCGTAATCTGGAACATCGTATGGG<br>TAGAACGACAAATGCGGGACT     | <i>pNTP3</i> (For expressing TgEK-HA in tachyzoites)                            |
| <b>Promoter Displacement of TgCK in <i>T. gondii</i></b>                         |                                                                                                              |                                                                                 |
| TgCK-PD-5'UTR-F ( <i>NdeI</i> )<br>TgCK-PD-5'UTR-R ( <i>NdeI</i> )               | CTCATCC <u>CATATG</u> GGATGAAGTGTGTGGTCTG<br>CTCATCC <u>CATATG</u> TGTAAGTCTAGGCGACTACACAGC                  | <i>pDT7S4</i> (promoter displacement of TgCK in the TaTi- <i>Aku80</i> strain)  |
| TgCK-PD-3'UTR-F ( <i>BglII</i> )<br>TgCK-PD-3'UTR-R ( <i>AvrII</i> )             | CTCATC <u>AGATCT</u> ATGCAGGTA <u>CTCGCGTGTG</u><br>CTCATCC <u>CTAGGGAACGGGTACTCCATCAGGTAGT</u>              | <i>pDT7S4</i> (promoter replacement of TgCK in the TaTi- <i>Aku80</i> strain)   |
| TgCK-PD-5'Scr-F<br>TgCK-PD-5'Scr-R (DHFR-R)                                      | CATTCCGAGGCGGATAAA<br>CGGGTTGAATGCAAGGTT                                                                     | Screening for 5'-crossover in transgenic TaTi- <i>Aku80</i> strain              |
| TgCK-PD-3'Scr-F (DHFR-F)<br>TgCK-PD-3'Scr-R                                      | CTCTCTTTTCGAGGGATCAG<br>ACAACCTGTCTCTGCACCG                                                                  | Screening for 3'-crossover in transgenic TaTi- <i>Aku80</i> strain              |
| <b>Conventional Knockout of TgCK in <i>T. gondii</i></b>                         |                                                                                                              |                                                                                 |
| TgCK-KO-5'UTR-F ( <i>HindIII</i> )<br>TgCK-KO-5'UTR-R ( <i>NheI</i> )            | CTC <u>AAGCTT</u> CGTAGGATAGAAGCGAGTCGTT<br>CTCGCTAGCCGCTAGGAGGTTCAAATTTGC                                   | <i>p2854</i> (conventional knockout of TgCK in the <i>HXGPRT</i> strain)        |
| TgCK-KO-3'UTR-F ( <i>NotI</i> )<br>TgCK-KO-3'UTR-R ( <i>NotI</i> )               | CTCGCGGCCGCTCGGATAACACAGTGGAACTTGG<br>CTCGCGGCCGCTCACACAAAGAGGGCCG                                           | <i>p2854</i> (conventional knockout of TgCK in the <i>HXGPRT</i> strain)        |
| TgCK-KO-5'Scr-F<br>TgCK-KO-5'Scr-R                                               | CCTCGTTTCTAGATAAAAGGCTGC<br>ATGCAAGGTTTCGTGCTGTC                                                             | Screening of 5'-crossover in transgenic <i>HXGPRT</i> strain                    |
| TgCK-KO-3'Scr-F<br>TgCK-KO-3'Scr-R                                               | CGAATCCAGATGGAGATGGCTGTC<br>AGAATGCGAGTGTCTGGCAA                                                             | Screening of 3'-crossover in transgenic <i>HXGPRT</i> strain                    |

| <b>Quantitative PCR of <i>TgCK</i> transcript</b>                            |                                                                            |                                                                                 |
|------------------------------------------------------------------------------|----------------------------------------------------------------------------|---------------------------------------------------------------------------------|
| <i>TgCK</i> -Ex1-F<br><i>TgCK</i> -Ex1-R                                     | CTTTGTTTCTGGTGGCCAGT<br>CCCGATAAACGACTGCACTT                               | EST encoded by the exon 1 of full-length choline kinase                         |
| <i>TgCK</i> -Ex6-F<br><i>TgCK</i> -Ex6-R                                     | TCTTCTCCGTCCACTTGACC<br>GTCCACCATAGCCTTGGAAA                               | EST encoded by the exon 6 of full-length choline kinase                         |
| <i>TgElf1</i> α-F<br><i>TgElf1</i> α-R                                       | AGTCGACCACTACCGGACAC<br>CTCGGCCTTCAGTTTATCCA                               | Housekeeping gene for normalizing the expression of ESTs from choline kinase    |
| <b>GFP expression in <i>E. coli</i></b>                                      |                                                                            |                                                                                 |
| <i>TgCK</i> -Ex1.1-F ( <i>XcmI</i> )<br><i>TgCK</i> -Ex1.1-R ( <i>NsiI</i> ) | CTCCACCGGTCACCTGGATGCAGGTA CTGCGTGTGT<br>CTCATGCATATCCCTAAAAGTTGAAACACGC   | A fragment of exon 1 of choline kinase until the 3 <sup>rd</sup> ATG (1-729 bp) |
| <i>TgCK</i> -Ex1.2-F ( <i>XcmI</i> )<br><i>TgCK</i> -Ex1.2-R ( <i>NsiI</i> ) | CTCCACCGGTCACCTGGATGCAGGTA CTGCGTGTGT<br>CTCATGCATGGGGTTGCTGCCAGTGCG       | A fragment of exon 1 of choline kinase until the 2 <sup>nd</sup> ATG (1-492 bp) |
| <i>TgGRA2</i> -F ( <i>XcmI</i> )<br><i>TgGRA2</i> -R ( <i>NsiI</i> )         | CTCCACCGGTCACCTGGCGTCTCAGCTGCGCGAGG<br>CTCATGCATCTTGCTTGATTCTTCAAAGAACACAG | A minimal promoter element of the dense granule 2 (Gra2) protein                |
| GFP-F ( <i>NsiI</i> )<br>GFP-R ( <i>PacI</i> )                               | CTCATGCATAAAGGAGAAGAACTTTTCACTGGA<br>CTCTTAATTAATTATTGTATAGTTTCATCCATGCCA  | ORF of the green fluorescent protein                                            |
